1 **Effect of leaf temperature on estimating physiological traits of wheat leaves from**  
2 **hyperspectral reflectance**

3 **Hammad A Khan<sup>1,\*</sup>, Yukiko Nakamura<sup>1,2</sup>, Robert T Furbank<sup>1,3</sup> and John R Evans<sup>1</sup>**

4 <sup>1</sup> ARC Centre of Excellence for Translational Photosynthesis, Research School of Biology. The  
5 Australian National University, Canberra, ACT 2601, Australia

6 <sup>2</sup> Graduate School of Life Sciences, Tohoku University, Japan

7 <sup>3</sup> CSIRO Agriculture & Food, Canberra, ACT 2601, Australia

8 \* Present address: CSIRO Agriculture & Food, Waite Campus, Glen Osmond, SA 5064,  
9 Australia

10 ORCID

11 HK [0000-0001-7859-8274](https://orcid.org/0000-0001-7859-8274)

12 RTF [0000-0001-8700-6613](https://orcid.org/0000-0001-8700-6613)

13 JRE 0000-0003-1379-3532

14

15 **Abstract**

16 A growing number of leaf traits can be predicted from hyperspectral reflectance data. These  
17 include structural and compositional traits, such as leaf mass per area, nitrogen and  
18 chlorophyll content, but also physiological traits such as Rubisco carboxylation activity,  
19 electron transport rate and respiration rate. Since physiological traits vary with leaf  
20 temperature, how does this impact on predictions made from reflectance measurements?  
21 We investigated this with two wheat varieties, by repeatedly measuring each leaf through a  
22 sequence of temperatures imposed by varying the air temperature in a growth room. The  
23 function predicting Rubisco capacity normalised to 25 °C predicted the same value,  
24 regardless of leaf temperatures ranging from 20 to 35°C. Leaf temperature affected none of  
25 the predicted traits:  $V_{\text{cmax}25}$ , J, chlorophyll content, LMA, N content per unit leaf area or  
26  $V_{\text{cmax}25}/\text{N}$ . However, as others have derived models to predict Rubisco activity that includes  
27 variation associated with leaf temperature, we discuss whether these functions may include  
28 a temperature signal within the reflectance spectra.

29 **Keywords:** Leaf temperature, hyperspectral reflectance, Rubisco carboxylation activity,  
30 electron transport rate, leaf dry mass per area, chlorophyll content, leaf nitrogen, *Triticum*  
31 *aestivum*

32 **Introduction**

33 Plant breeders continually strive to improve crop yield. For cereals, there has been a  
34 recognition that future increases could benefit from improving photosynthesis (Parry *et al.*,  
35 2011; Reynolds *et al.*, 2009). Crop growth is not simply related to a measurement of  
36 photosynthetic rate of a particular leaf under one condition. Instead, photosynthesis

37 integrated over a day with contributions from all the leaves in the canopy drives crop  
38 growth. Subsequent conversion into biomass and the partitioning into harvested grains  
39 determines yield. All these processes combined pose a major challenge on how to  
40 meaningfully measure photosynthesis with the goal of improving yield. However, there are  
41 a few examples that have compared historical sequences of cultivars and observed  
42 correlations between leaf photosynthetic rate and wheat yield (Beche *et al.*, 2014; Fischer *et al.*,  
43 1998; Gaju *et al.*, 2016; Yao *et al.*, 2019). It has also been found that radiation use  
44 efficiency (above ground biomass produced per unit of intercepted photosynthetically  
45 active radiation) has been increasing over time with changing wheat varieties in both the UK  
46 (Shearman *et al.*, 2005) and Australia (Sadras *et al.*, 2012). Interestingly, both studies found  
47 the same rate of increase ( $0.012 \text{ g MJ}^{-1} \text{ y}^{-1}$ ).

48 It is possible to survey photosynthetic properties between wheat genotypes (Driever  
49 *et al.*, 2014; Silva-Pérez *et al.*, 2019), but detailed phenotyping is time-consuming which  
50 limits the number of genotypes that can be sampled. A promising alternative is to predict  
51 photosynthetic traits from leaf reflectance spectra. Serbin *et al.* (2012) derived models  
52 predicting nitrogen concentration, leaf dry mass per unit area, maximum Rubisco  
53 carboxylase activity ( $V_{\text{cmax}}$ ) and photosynthetic electron transport rate (J) from hyperspectral  
54 reflectance measured on leaves of *Populus tremuloides* and *P. deltoides*. Leaf temperature  
55 varied between 20 and 30 °C, depending on the glasshouse regime, which strongly  
56 influenced  $V_{\text{cmax}}$ . A single model was presented that applied to both species, regardless of  
57 leaf temperature. It was argued that this implied that the derived  $V_{\text{cmax}}$  was not being  
58 predicted indirectly from another trait such as nitrogen (Serbin *et al.*, 2012). The  
59 hyperspectral reflectance approach was also successfully used to predict  $V_{\text{cmax}}$  for *Glycine*  
60 *max* measured between 26 and 34°C (Ainsworth *et al.*, 2014) and *Nicotiana tabacum*  
61 (Meacham-Hensold *et al.*, 2019) and *Zea mays* (Yendrek *et al.*, 2017) measured at various  
62 temperatures in the field.

63 In order to be able to make useful comparisons of Rubisco capacity between plants  
64 which may differ in their leaf temperature during sampling, one needs to know both  $V_{\text{cmax}}$   
65 and leaf temperature. Alternatively, one could use the temperature responses of the  
66 Rubisco enzyme kinetic parameters (Bernacchi *et al.*, 2003; Silva-Perez *et al.*, 2017) to  
67 convert gas exchange estimates of  $V_{\text{cmax}}$  to a common temperature, e.g. 25°C ( $V_{\text{cmax}25}$ ),  
68 which are then used to build a model from reflectance data. This has been done for a group  
69 of 37 broadleaf tree species (Dechant *et al.*, 2017), wheat (Silva-Perez *et al.*, 2018) and 21  
70 tropical tree species from Panama and Brazil (Wu *et al.*, 2019). Heckmann *et al.* (2017) also  
71 presented predictions of  $V_{\text{cmax}}$  for *Brassica*, *Moricandia* and *Z. mays* from reflectance  
72 spectra, but measured only at 25°C. While Dechant *et al.* (2017) normalised their gas  
73 exchange to 25°C, the reflectance spectra were collected at prevailing leaf temperatures. It  
74 is not known whether the prediction of  $V_{\text{cmax}25}$  from leaf reflectance is insensitive to the  
75 temperature of the leaf during the reflectance measurement. We, therefore, set out to  
76 specifically assess whether leaf trait predictions from hyperspectral reflectance varied with  
77 leaf temperature by repeatedly measuring the same leaf sequentially through a range of  
78 temperatures in two wheat cultivars. We hypothesized that leaf temperature would not  
79 affect predicted values of leaf traits obtained using leaf hyperspectral reflectance.

80

## 81 **Materials and Methods**

### 82 *Plant material and growth conditions*

83 Expt 1 Two spring wheat genotypes (*Triticum aestivum* Kukri and Seri) were grown in a  
84 naturally lit greenhouse (day/night temperatures set at 25/15 °C) at the Australian National  
85 University in Canberra during Sep-Nov 2018. Three seeds were sown in well-drained 3.5-litre  
86 pots filled with commercial potting mix, containing basal fertilizer Osmocote (Scotts). Pots  
87 were laid out according to randomized block design with six replicates and blocks  
88 representing the replications. After emergence, seedlings were thinned down to one plant  
89 per pot. Plants were watered daily until the end of the experiment.

90 Temperature treatment was given in a controlled environmental chamber, with day/night  
91 temperatures set at 25/15 °C and irradiance set to 500  $\mu\text{mol photons m}^{-2} \text{s}^{-1}$ . All the  
92 measurements were made seven days after anthesis. Plants were moved to the chamber  
93 one day before the actual measurements so that plants could acclimatize to the chamber's  
94 environmental conditions. The next day, measurements were made at a chamber  
95 temperature of 15, 25, 35 and 15 °C, in the described sequence. After achieving the desired  
96 chamber temperature, plants were acclimatized at least 1 hr before the measurements  
97 were made.

98 Expt 2 Two spring wheat genotypes (Kukri and Seri) and one triticale (Hawkeye) were grown  
99 in a greenhouse with temperature set to 20/15 °C (day/night). Seeds were sown on multiple  
100 days in March 2018 and each genotype was sown separately in shallow tray with raising mix.  
101 After germination, seedlings were transplanted into 5L pots filled commercial potting mix,  
102 containing basal fertilizer Osmocote (Scotts). Five-six weeks after sowing, half of the plants  
103 were transferred to an adjacent greenhouse room set at 32/20 °C, where they grew for one-  
104 two more weeks before gas exchange measurements were made.

### 105 *Hyperspectral reflectance measurements (Expt 1)*

106 Hyperspectral reflectance spectra were measured with a FieldSpec®4 (Analytical Spectral  
107 Devices, Boulder, CO, USA) full range spectroradiometer (350–2500 nm) attached to a leaf  
108 clip (Analytical Spectral Devices, Boulder, CO, USA) with a fibre optic cable. Leaf clip had an  
109 internal calibrated light source and two external panels i.e. a white panel to calibrate the  
110 instrument and a black panel for taking measurements. A mask containing a black circular  
111 gasket was also attached to leaf clip, which was used to reduce the leaf-clip aperture to an  
112 oval area ( $1.15 \times 1.4 \text{ cm} = 1.264 \text{ cm}^2$ ) suitable for a wheat leaf (Silva Perez ref). For each  
113 temperature, one reflectance measurement was made at the same place of the flag leaf of  
114 each plant by putting the leaf vertically to the leaf probe as explained elsewhere (Silva-Perez  
115 *et al.*, 2018).

116 Leaf reflectance spectra were processed according to Silva-Perez *et al.* (2018). A 'jump'  
117 correction associated with a change in the detectors at 1000 and 1800 nm was applied  
118 before the traits were predicted.

### 119 *MultispeQ measurements (Expt 1)*

120 Linear electron transport (LET) and relative chlorophyll content (SPAD units) measurements  
121 were carried out using a handheld MultispeQ (Beta) device linked to the PhotosynQ  
122 platform ([www.photosynq.org](http://www.photosynq.org)) (Kuhlgert *et al.*, 2016). Relative chlorophyll content (SPAD  
123 units) was estimated by measuring the transmittance of red (650 nm) and infrared (940 nm)  
124 light. LET was estimated from the measurements of quantum yield of photosystem II (ϕII) via  
125 pulse-amplitude modulation (PAM) fluorometry at photosynthetically active radiation (PAR)  
126 of 1000 μmol photons m<sup>-2</sup> s<sup>-1</sup> (Kuhlgert *et al.*, 2016).

### 127 *Gas-exchange measurements (Expt 2)*

128 Gas exchange was measured on the most recently fully expanded leaves with a LI-6400XT  
129 Portable Photosynthesis system (LI-COR Biosciences Inc., Lincoln, NE, USA) on plants placed  
130 inside a controlled environment cabinet (Thermoline Science Model-TRIL/SL). The air flow  
131 rate was 500 μmol s<sup>-1</sup> with a PPFD of 1800 μmol m<sup>-2</sup> s<sup>-1</sup> supplied by the LED light. Gas  
132 exchange was measured at leaf temperatures of 15, 25 and 35°C. At each temperature, CO<sub>2</sub>  
133 response curves were measured in 21% O<sub>2</sub> using inlet CO<sub>2</sub> concentrations of 400, 50, 100,  
134 150, 250, 400, 600, 800, 1000, 400 μmol mol<sup>-1</sup>. Subsequently, the air was changed to 2% O<sub>2</sub>  
135 with a CO<sub>2</sub> concentration in the leaf chamber of 380 μmol mol<sup>-1</sup>, the flow reduced to 200  
136 μmol s<sup>-1</sup> and measurement continued for 60 minutes with concurrent sampling for carbon  
137 isotope discrimination to determine mesophyll conductance (Evans and von Caemmerer,  
138 2013). Maximum Rubisco carboxylase activity ( $V_{cmax}$ ) was calculated from CO<sub>2</sub> response  
139 curves using kinetic constants derived from wheat (Silva-Pérez *et al.*, 2017).

### 140 Statistical analysis

141 Data were subjected to analysis of variance using various packages in R (R coreR, 2013).  
142 Means were compared for significant differences using Tukey's multiple comparison tests at  
143 5% probability level.

## 144 **Results**

145 The consequence of using leaf reflectance spectra collected from leaves with varying  
146 temperatures to predict leaf traits was investigated with two wheat varieties.

147 The predicted value of  $V_{cmax25}$  was not affected by the leaf temperature when  
148 reflectance spectra were measured, for either cultivar (Fig. 1A). Upon returning the growth  
149 cabinet to 15°C, the  $V_{cmax25}$  values were not significantly different from the initial values. By  
150 contrast,  $V_{cmax}$  values derived from gas exchange increased fourfold between 15 and 35°C  
151 (Fig. 1B). Values for wheat grown under cool or hot conditions showed a difference at 35°C,  
152 with the cool grown plants falling further below the theoretical line (consistent with an  $E_a$  of  
153 63kJ mol<sup>-1</sup>) than plants from the hot treatment. The values for plants from the hot  
154 treatment superimpose the previously published data from Silva-Perez *et al.* (2017).

155 Predicted values for the rate of electron transport,  $J$ , were also independent of the  
156 leaf temperature when reflectance spectra were measured (Fig. 2A). In this case, the model  
157 was built from data collected under a PPFD of 1800 μmol m<sup>-2</sup> s<sup>-1</sup> and leaf temperatures

158 mainly at 25°C but ranging up to 32°C. However, in contrast to  $V_{\text{cmax}}$ ,  $J$  is less sensitive to leaf  
159 temperature, increasing by 30% between 15 and 25°C and then plateauing (Fig. 2B). The  
160 temperature responses of  $J$  were comparable to the previously published data from Silva-  
161 Perez et al. (2017). Growth temperature shifted the temperature response. For plants  
162 grown under hot conditions,  $J$  was less than that from plants grown under cool conditions at  
163 15°C but greater at 35°C. We also measured  $J$  using a MultispeQ instrument following the  
164 collection of leaf reflectance spectra at each temperature (denoted LET, Fig. 2A). This was  
165 measured under a PPFD of  $1000 \mu\text{mol m}^{-2} \text{s}^{-1}$ , similar to the irradiance in the growth cabinet.  
166 As it was collected rapidly, it does not represent the steady state. However, it also indicated  
167 that the rate of electron transport was similar between 20 and 30°C, then declined slightly  
168 at 35°C.

169 Predicted values of chlorophyll content were insensitive to the leaf temperature  
170 when reflectance spectra were measured (Fig. 3). A similar result was observed for  
171 chlorophyll content estimated with the MultispeQ. The absolute values obtained with the  
172 MultispeQ were about 20% greater than that predicted from reflectance. The chlorophyll  
173 content values are predicted from reflectance using a model built on measurements using  
174 SPAD-502 chlorophyll meter (Minolta Camera Co., Ltd, Japan) whereas the MultispeQ uses  
175 relative transmissions of red (650 nm) and infrared (940 nm) light. Additionally, MultispeQ  
176 has two in built differences from Minolta SPAD; 1) MultispeQ takes a series of transmittance  
177 measurements over a range of increasing light intensities, and 2) MultispeQ also averages  
178 values over a larger leaf area ( $\sim 1 \text{ cm}^2$ ) (Kuhlgert et al. 2016). Nevertheless, additional  
179 calibration comparisons were not made as the focus was on temperature. Values predicted  
180 for three other leaf traits, leaf dry mass per unit leaf area (LMA), nitrogen content and  
181 Rubisco carboxylation capacity normalised to 25 °C per unit leaf nitrogen ( $V_{\text{cmax}25}/N$ ), were  
182 also independent of the leaf temperature when reflectance spectra were measured (Fig. 4).  
183 A statistical comparison of the effects of temperature treatments on various measured and  
184 predicted leaf traits is also provided separately (Supp. Table 1).

185 The spectral response of correlations between single wavelength reflectance values  
186 and leaf temperature is shown superimposed on the reflectance spectrum (Fig. 5). Clear  
187 correlations were observed on the long wavelength shoulders of the two water absorption  
188 bands with peaks at 1531 and 2038nm and a third peak in the red edge at 720nm. By  
189 sequentially adding weighted reflectance values from single wavelengths, we were able to  
190 predict leaf temperature remarkably well with just four wavelengths (Fig. 6).

## 191 Discussion

192 Leaf hyperspectral reflectance is an optical signal that can provide information  
193 remotely and rapidly. With appropriate calibration data obtained from other methods,  
194 predictive models can be built for a range of leaf traits. The method has potential for use as  
195 a high-throughput tool for phenotyping photosynthetic traits at the leaf and canopy scale.  
196 While one might expect leaf reflectance to enable prediction of the amount of a substance  
197 e.g. leaf dry mass or nitrogen per unit area, it is harder to understand how physiological  
198 processes such as rates of reactions could contribute to reflectance. Thus, with Rubisco

199 being such a major constituent of leaf protein, a reflectance model could arise from a signal  
200 associated with leaf protein or nitrogen, as argued by Dechant et al. (2017). If this was the  
201 case, then changing leaf temperature would alter Rubisco activity but not Rubisco content.  
202 However, Serbin et al. (2012) successfully included variation in leaf temperature to derive a  
203 model predicting Rubisco activity, demonstrating that the model was not fundamentally  
204 associated with another constituent such as nitrogen. In contrast to gas exchange  
205 measurements, where leaf temperature is measured directly to enable the calculation of  
206 stomatal conductance, leaf temperature is not generally measured directly during the  
207 collection of hyperspectral reflectance. Consequently, it is necessary to consider how leaf  
208 temperature affects the estimation of physiological traits, such as  $V_{\text{cmax}}$  and  $J$ , using leaf  
209 hyperspectral reflectance.

#### 210 *Parameters independent of temperature*

211 A leaf structural property that has been widely reported is leaf dry mass per unit leaf  
212 area as it is easy to measure and relates to lifespan and other traits (Wright *et al.*, 2004).  
213 Robust predictions of LMA can be made from hyperspectral reflectance data (Ecartot *et al.*,  
214 2013; Serbin *et al.*, 2012; Silva-Perez *et al.*, 2018). As LMA is a leaf property that would not  
215 change in response to short term changes in temperature, models predicting LMA from  
216 hyperspectral reflectance should also be insensitive to the temperature of the leaf during  
217 measurement. This was found to be true for LMA (Fig. 4A) as well as for other leaf  
218 constituents, chlorophyll (Fig. 3) and nitrogen (Fig. 4B).

219 Photosynthesis is a process involving many constituents, but has been successfully  
220 modelled in  $C_3$  plants by considering the properties of Rubisco (Farquhar *et al.*, 1980).  
221 Knowing the amount of Rubisco per unit leaf area, its properties and a few assumptions, it is  
222 possible to predict photosynthetic responses to irradiance, atmospheric  $\text{CO}_2$  and  
223 temperature. The amount of Rubisco is unlikely to vary significantly during short term  
224 changes in leaf temperature, but the carboxylase activity is strongly temperature dependent  
225 (Badger and Collatz, 1977; Bernacchi *et al.*, 2001; Sharwood *et al.*, 2016). Therefore, models  
226 using reflectance to predict Rubisco content or activity normalised to a fixed temperature  
227 should be independent of leaf temperature. Indeed, this was what we observed (Fig. 1A).

#### 228 *Parameters that vary with temperature*

229 Enzyme activities vary with temperature which can be described with the Arrhenius  
230 equation through the energy of activation term  $E_a$ .  $V_{\text{cmax}}$  is the product of Rubisco content  
231 and catalytic rate. It seems possible that models predicting  $V_{\text{cmax}}$  from reflectance  
232 (Ainsworth *et al.*, 2014; Serbin *et al.*, 2012) may contain two components, one that is  
233 independent of temperature (representing Rubisco protein content) and another that varies  
234 with leaf temperature. Immediately prior to placing the leaf into the clip for measuring leaf  
235 reflectance, Ainsworth et al. (2014) measured leaf temperature with an infrared  
236 thermometer, but they only report the relationship between predicted  $V_{\text{cmax}}$  and leaf  
237 temperature. We, therefore, looked at our reflectance spectra collected at different leaf  
238 temperatures to see if we could predict leaf temperature. Predicted leaf temperature, using  
239 reflectance of just four wavelengths, clearly correlated with measured leaf temperature,

240 with an  $r^2$  of 0.91 (Fig. 6). It is unlikely that this equation has general application as it arose  
241 from only two genotypes measured under one environment and it is known that the power  
242 and generality of models predicting dark respiration (Coast *et al.*, 2019) and  $V_{\text{cmax}25}$  (Wu *et al.*,  
243 *et al.*, 2019) improved as the diversity of calibration data increased. However, the point is that  
244 leaf temperature apparently can be extracted from reflectance spectra which could explain  
245 how models can predict reaction rates from reflectance.

246 The Arrhenius equation predicts an exponential increase in rate with increasing  
247 temperature, whereas models calculating parameters from reflectance sum linear  
248 weightings of each reflectance at each wavelength and would, therefore, have linear  
249 responses to temperature. The difference between an exponential and a linear relationship  
250 may not be very noticeable over a narrow temperature range. In the case of  $V_{\text{cmax}}$ , values  
251 derived from gas exchange deviated below the Arrhenius function at 35°C (Fig. 1B), such  
252 that a linear function would fit the data well between 15 and 35°C. There are also  
253 indications that a single value for  $E_a$  may not be appropriate across the temperature range  
254 from 10 to 40°C. Sharwood *et al.* (2016) found it necessary to use lower values for  $E_a$  at leaf  
255 temperatures above 25°C. The rate of electron transport,  $J$ , also varies with temperature  
256 (Bernacchi *et al.*, 2003; June *et al.*, 2004; Medlyn *et al.*, 2002) but reaches a maximum  
257 around 30°C before decreasing again. As a result, the change in  $J$  between 20 and 35°C is  
258 less pronounced than for  $V_{\text{cmax}}$ . It is therefore uncertain whether models predicting  $J$  from  
259 reflectance (Dechant *et al.*, 2017; Serbin *et al.*, 2012; Silva-Perez *et al.*, 2018) would contain  
260 components that vary with temperature. In the case of  $J$  for wheat (Silva-Perez *et al.*, 2018),  
261 the reflectance model was built with data that varied little in leaf temperature and the  
262 predicted values of  $J$  were found to be unaffected by leaf temperature when reflectance  
263 was measured (Fig. 2A). However, given that  $J$  did not vary greatly over this temperature  
264 range (Fig. 2), this may not be a very rigorous test. By contrast, as Serbin *et al.* (2012)  
265 deliberately used variation in leaf temperature to generate a broader spread in  $J$  to build  
266 their reflectance model – testing their function with multiple spectra obtained from a leaf  
267 measured over a range of temperatures could be informative.

## 268 **Conclusion**

269 Leaf temperature varying between 20 to 35°C during the measurement of leaf  
270 reflectance did not affect predicted values of leaf traits ( $V_{\text{cmax}25}$ , chlorophyll and nitrogen  
271 contents per unit area, LMA and  $V_{\text{cmax}}/N$ ), for wheat. It was possible to extract leaf  
272 temperature from reflectance spectra which may explain how models that predict rates that  
273 vary with temperature ( $V_{\text{cmax}}$ ,  $J$ , dark respiration) could arise. Models predicting traits that  
274 vary with leaf temperature should be tested using multiple measurements from each leaf  
275 covering a range of temperature. Reflectance appears to have the potential to predict leaf  
276 temperature, but to construct a robust model would require calibration with a broader set  
277 of experiments.

## 278 **Acknowledgements**

279 This work was made possible by funding from the GRDC through grant ANU00025, which is  
280 part of IWYP60 Using next generation approaches to exploit phenotypic variation in

281 photosynthetic efficiency to increase wheat yield, financial support from the Australian  
282 Government through the Australian Research Council Centre of Excellence for Translational  
283 Photosynthesis (CE140100015), and a Cooperative Laboratory Study Program grant to YN.

284 **Supplementary material**

285 Table S1. Effects of leaf temperature on leaf physiological traits

286



Supplementary. Table 1. Effects of leaf temperature on leaf physiological traits measured using MultispeQ (leaf temperature, LET, relative chlorophyll) or predicted from leaf hyperspectral reflectance ( $V_{cmax25}$ , J, chlorophyll content, LMA, nitrogen content,  $V_{cmax25}/N$ ) in leaves of two wheat genotypes exposed to a sequence of ambient air temperatures i.e. 15, 25, 35 and 15 °C, in a growth chamber (Expt 1). Symbols represent the mean  $\pm$  SE of six different leaves from six different plants. Sequential measurements were made on each leaf, seven days after anthesis.

| Genotype | Ambient Air Temperature | Measured traits using MultispeQ |                                                         |                                   | Predicted traits using leaf hyperspectral reflectance                        |                                                       |                                  |                              |                                        |                                                                                |
|----------|-------------------------|---------------------------------|---------------------------------------------------------|-----------------------------------|------------------------------------------------------------------------------|-------------------------------------------------------|----------------------------------|------------------------------|----------------------------------------|--------------------------------------------------------------------------------|
|          |                         | Leaf Temperature (°C)           | LET ( $\mu\text{mol e}^- \text{m}^{-2} \text{s}^{-1}$ ) | Relative Chlorophyll (SPAD units) | $V_{cmax25}$ ( $\mu\text{mol CO}_2 \text{s}^{-1} \text{g}^{-1} \text{(N)}$ ) | J ( $\mu\text{mol e}^- \text{m}^{-2} \text{s}^{-1}$ ) | Chlorophyll content (SPAD units) | LMA ( $\text{g m}^{-2}$ )    | Nitrogen content ( $\text{g m}^{-2}$ ) | $V_{cmax25}/N$ ( $\mu\text{mol CO}_2 \text{s}^{-1} \text{g}^{-1} \text{(N)}$ ) |
| Kukri    | 15 °C                   | 19.6 $\pm$ 0.4                  | 142.9 $\pm$ 7.0                                         | 59.8 $\pm$ 0.7                    | 162.5 <sup>a</sup> $\pm$ 1.7                                                 | 196.2 <sup>ab</sup> $\pm$ 3.6                         | 51.8 <sup>ab</sup> $\pm$ 0.6     | 54.0 $\pm$ 1.2               | 2.81 $\pm$ 0.07                        | 59.6 <sup>b</sup> $\pm$ 1.2                                                    |
|          | 25 °C                   | 26.2 $\pm$ 0.2                  | 145.2 $\pm$ 9.2                                         | 59.9 $\pm$ 1.0                    | 154.2 <sup>b</sup> $\pm$ 1.8                                                 | 184.9 <sup>b</sup> $\pm$ 3.7                          | 52.6 <sup>a</sup> $\pm$ 0.4      | 57.4 $\pm$ 0.8               | 2.90 $\pm$ 0.05                        | 59.7 <sup>b</sup> $\pm$ 0.9                                                    |
|          | 35 °C                   | 33.4 $\pm$ 0.3                  | 127.0 $\pm$ 4.3                                         | 60.6 $\pm$ 0.6                    | 161.3 <sup>a</sup> $\pm$ 2.2                                                 | 196.3 <sup>ab</sup> $\pm$ 4.5                         | 50.8 <sup>b</sup> $\pm$ 0.4      | 56.3 $\pm$ 1.1               | 2.82 $\pm$ 0.06                        | 64.1 <sup>a</sup> $\pm$ 0.6                                                    |
|          | 15 °C                   | 19.5 $\pm$ 0.3                  | 145.4 $\pm$ 8.1                                         | 59.2 $\pm$ 1.0                    | 165.2 <sup>a</sup> $\pm$ 2.6                                                 | 203.8 <sup>a</sup> $\pm$ 5.0                          | 52.7 <sup>a</sup> $\pm$ 0.3      | 55.7 $\pm$ 1.1               | 2.89 $\pm$ 0.05                        | 60.6 <sup>b</sup> $\pm$ 1.0                                                    |
|          | LSD (5%)                |                                 | n.s.                                                    | n.s.                              | 6.2 <sup>**</sup>                                                            | 12.5 <sup>*</sup>                                     | 1.3 <sup>*</sup>                 | n.s.                         | n.s.                                   | 2.8 <sup>*</sup>                                                               |
| Seri     | 15 °C                   | 19.7 $\pm$ 0.3                  | 144.2 <sup>a</sup> $\pm$ 5.2                            | 62.7 $\pm$ 0.8                    | 173.9 $\pm$ 2.4                                                              | 209.2 $\pm$ 4.0                                       | 53.7 $\pm$ 0.4                   | 56.9 <sup>b</sup> $\pm$ 0.7  | 3.05 $\pm$ 0.05                        | 60.1 <sup>b</sup> $\pm$ 0.8                                                    |
|          | 25 °C                   | 27.3 $\pm$ 0.1                  | 148.6 <sup>a</sup> $\pm$ 6.1                            | 63.3 $\pm$ 0.8                    | 169.5 $\pm$ 2.2                                                              | 203.5 $\pm$ 3.7                                       | 53.8 $\pm$ 0.2                   | 58.5 <sup>ab</sup> $\pm$ 0.6 | 3.08 $\pm$ 0.05                        | 61.0 <sup>b</sup> $\pm$ 0.7                                                    |
|          | 35 °C                   | 34.9 $\pm$ 0.4                  | 124.9 <sup>b</sup> $\pm$ 3.2                            | 64.5 $\pm$ 0.8                    | 169.4 $\pm$ 2.2                                                              | 203.7 $\pm$ 4.3                                       | 53.5 $\pm$ 0.4                   | 60.4 <sup>a</sup> $\pm$ 0.7  | 3.05 $\pm$ 0.05                        | 65.7 <sup>a</sup> $\pm$ 0.7                                                    |
|          | 15 °C                   | 19.6 $\pm$ 0.2                  | 145.1 <sup>a</sup> $\pm$ 6.5                            | 62.8 $\pm$ 0.7                    | 168.4 $\pm$ 2.2                                                              | 208.5 $\pm$ 3.7                                       | 53.0 $\pm$ 0.3                   | 57.9 <sup>b</sup> $\pm$ 0.9  | 2.96 $\pm$ 0.04                        | 61.5 <sup>b</sup> $\pm$ 0.5                                                    |
|          | LSD (5%)                |                                 | 15.9 <sup>*</sup>                                       | n.s.                              | n.s.                                                                         | n.s.                                                  | n.s.                             | n.s.                         | 2.1 <sup>*</sup>                       | n.s.                                                                           |

\*\*\* =  $P < 0.001$ , \*\* =  $P < 0.01$ , \* =  $P < 0.05$ , n.s. = non-significant

Figures

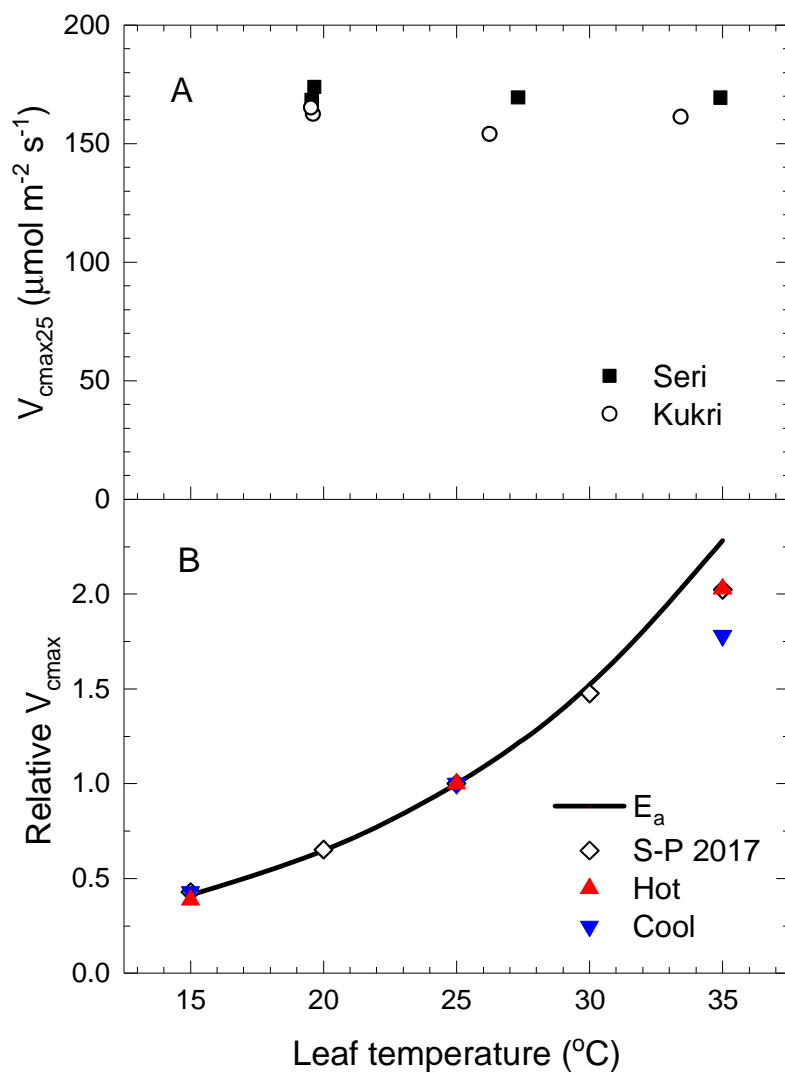

Fig. 1. Effects of leaf temperature on Rubisco activity in wheat. A. The maximum rate of carboxylation by Rubisco normalised to 25 °C ( $V_{cmax25}$ ) predicted from leaf hyperspectral reflectance measurements at different leaf temperatures. Seven days after anthesis, two wheat genotypes were exposed to a sequence of ambient air temperatures i.e. 15, 25, 35 and 15 °C, in a growth chamber (Expt 1). Symbols represent the mean  $\pm$  SE of six different leaves from six different plants. B. Temperature response of  $V_{cmax}$  normalised to 1 at 25 °C derived from gas exchange measurements (symbols) or modelled ( $E_a$  63 kJ mol<sup>-1</sup>). Data from plants grown under hot (20/15 °C) or cool (32/20 °C) conditions (Expt 2), or from Silva-Perez et al. (2017).

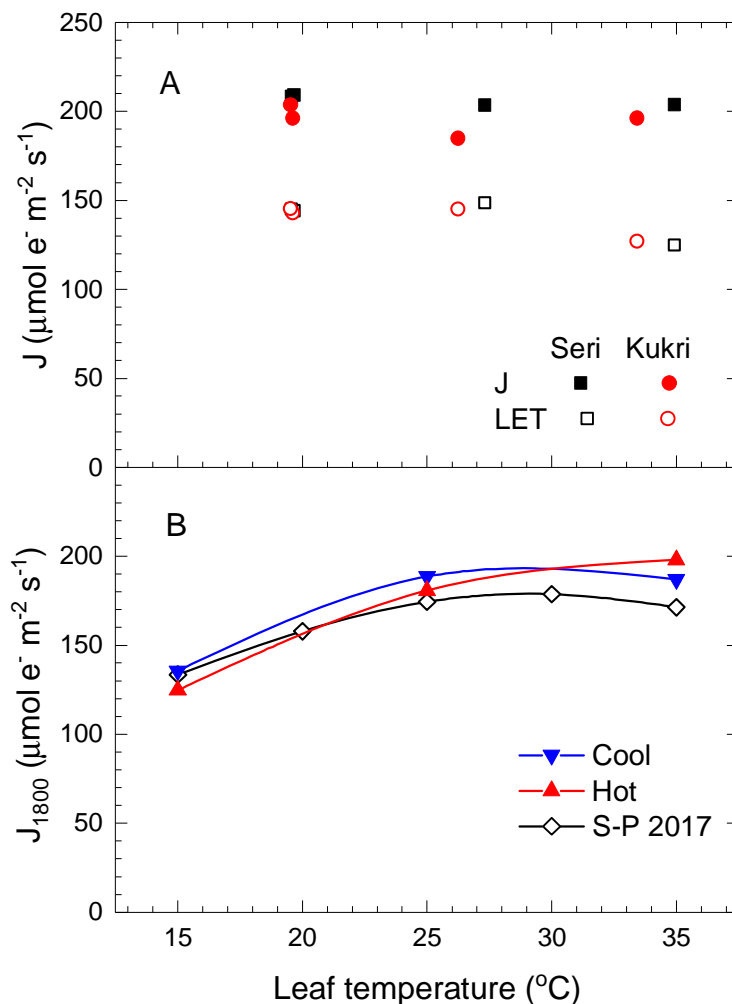

Fig. 2. Effects of leaf temperature on electron transport rate in wheat. A. Rate of electron transport ( $J$ ) predicted from leaf reflectance under a PPFD of  $1800 \mu\text{mol m}^{-2} \text{s}^{-1}$  (solid symbols) and linear electron transport (LET) measured using MultispeQ under a PPFD of  $1000 \mu\text{mol m}^{-2} \text{s}^{-1}$  (open symbols) at each leaf temperature. Seven days after anthesis, two wheat genotypes were exposed to a sequence of ambient air temperatures i.e. 15, 25, 35 and 15  $^{\circ}\text{C}$ , in a growth chamber (Expt 1). Symbols represent the mean  $\pm$  SE of six different leaves from six different plants. . B. Rates of electron transport calculated from gas exchange measurements made under a PPFD of  $1800 \mu\text{mol m}^{-2} \text{s}^{-1}$  from plants grown under cool (20/15  $^{\circ}\text{C}$ ) or hot (32/20  $^{\circ}\text{C}$ ) conditions (Expt 2), or from Silva Perez et al. (2017).

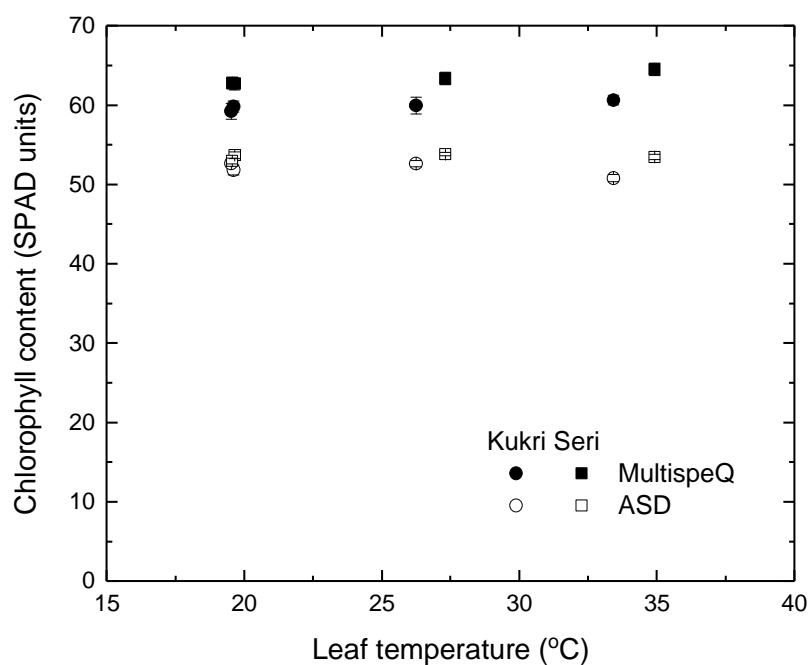

Fig. 3. Effects of leaf temperature on estimated chlorophyll content (SPAD units) in wheat. Seven days after anthesis, two wheat genotypes were exposed to a sequence of ambient air temperatures i.e. 15, 25, 35 and 15 °C, in a growth chamber (Expt 1). Symbols represent the mean  $\pm$  SE of six different leaves from six different plants. Leaf chlorophyll content was estimated using two different devices i.e. direct measurements with MultispeQ or predicted from leaf hyperspectral reflectance measurements made with an ASD FieldSpec Spectroradiometer.

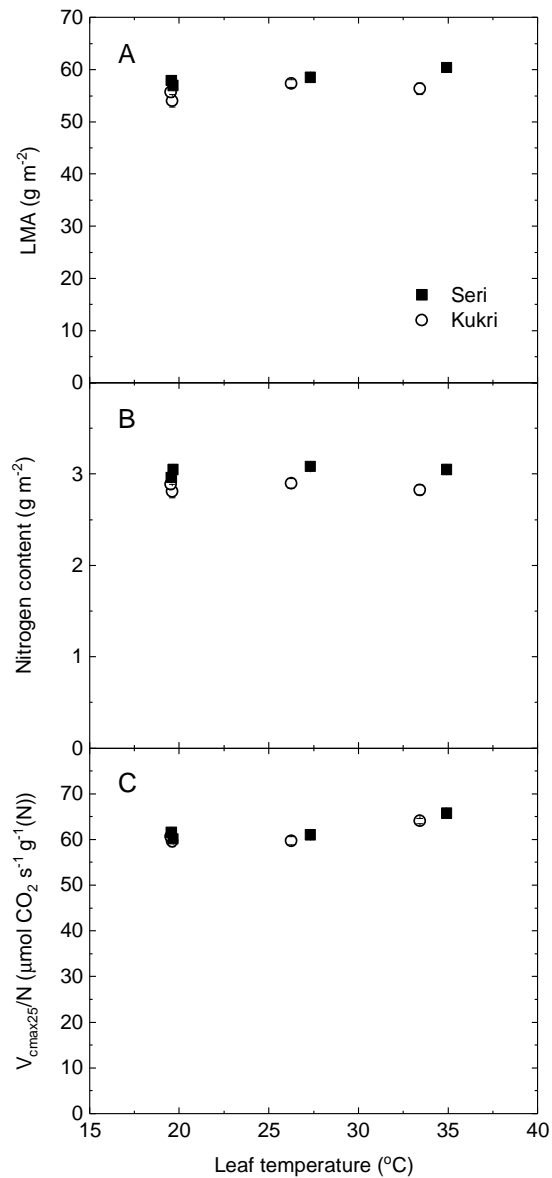

Fig. 4. Effects of leaf temperature on parameters predicted from leaf hyperspectral reflectance in wheat. A. Leaf dry mass per unit leaf area (LMA). B. Nitrogen content per unit leaf area. C. Rubisco carboxylation capacity normalised to 25 °C per unit leaf nitrogen ( $V_{cmax25}/N$ ). Seven days after anthesis, two wheat genotypes were exposed to a sequence of ambient air temperatures i.e. 15, 25, 35 and 15 °C, in a growth chamber (Expt 1). Symbols represent the mean  $\pm$  SE of six different leaves from six different plants.

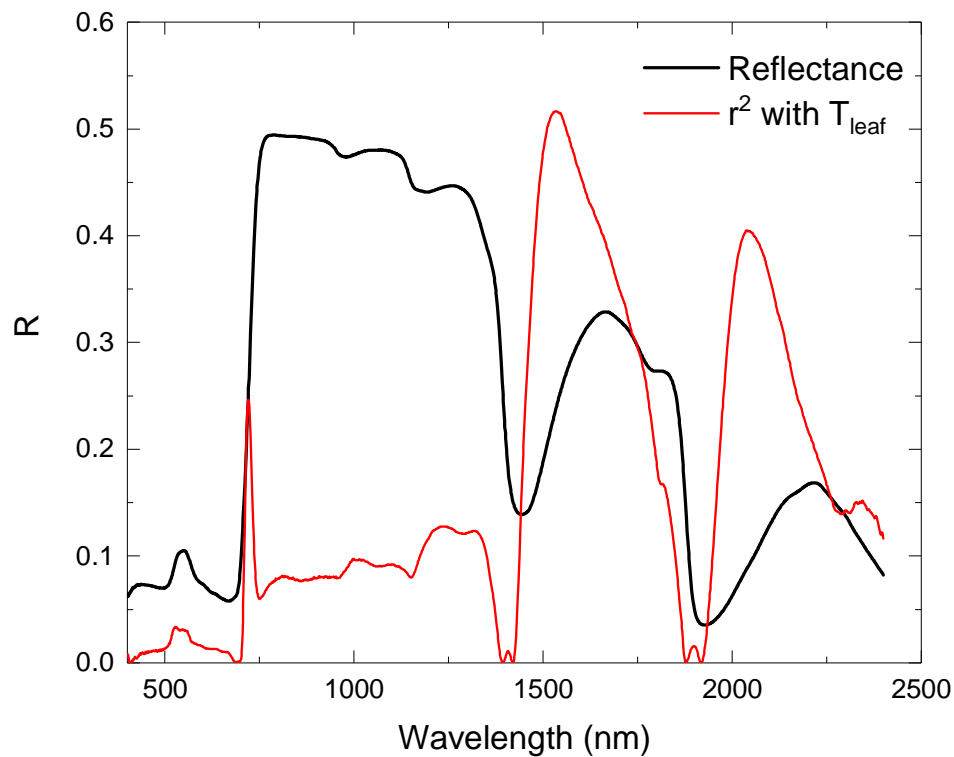

Fig. 5. Reflectance spectrum from a wheat leaf measured at 27°C (black thick line) with the spectral response of the correlation coefficient between leaf temperature and leaf reflectance (red thin line) superimposed.

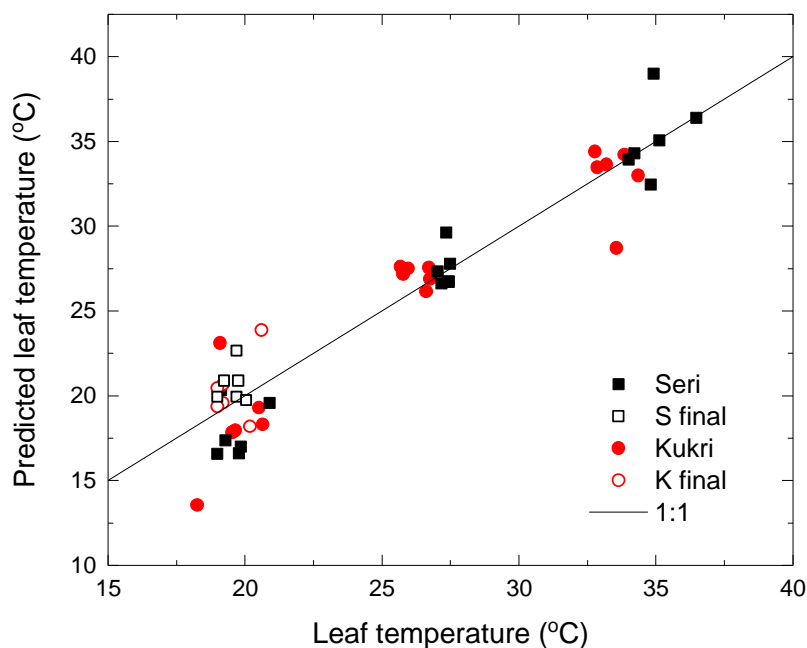

Fig. 6. Relationship between leaf temperature predicted from reflectance and measured using MultispeQ in wheat. Two wheat genotypes were exposed to a sequence of ambient air temperatures i.e. 15, 25, 35 and 15 °C which resulted in the leaf temperature increasing from 20 to 35°C (solid symbols) then decreased back to 20°C (open symbols) (Expt 1). Measurements were made on six different leaves from six different plants. The predicted leaf temperature was calculated as:  $T_{\text{leaf}} = 1071.4 R_{1531} - 945.65 R_{1400} - 176.3 R_{1507} + 196.8 R_{697}$ . The fitted regression equation (not shown) was  $y = 1.015x - 0.4$ ,  $r^2 = 0.91$ .

## References

- Ainsworth EA, Serbin SP, Skoneczka JA, Townsend PA.** 2014. Using leaf optical properties to detect ozone effects on foliar biochemistry. *PHOTOSYNTHESIS RESEARCH* **119**, 65-76.
- Badger M, Collatz GJ.** 1977. Studies on the kinetic mechanism of ribulose-1,5-bisphosphate carboxylase and oxygenase reactions, with particular reference to the effect of temperature on kinetic parameters. *Carnegie Yearbook*, Vol. 76, 355-361.
- Beche E, Benin G, da Silva CL, Munaro LB, Marchese JA.** 2014. Genetic gain in yield and changes associated with physiological traits in Brazilian wheat during the 20th century. *European Journal of Agronomy* **61**, 49-59.
- Bernacchi CJ, Pimentel C, Long SP.** 2003. In vivo temperature response functions of parameters required to model RuBP-limited photosynthesis. *Plant, Cell & Environment* **26**, 1419-1430.
- Bernacchi CJ, Singsaas EL, Pimentel C, Portis AR, Long SP.** 2001. Improved temperature response functions for models of Rubisco-limited photosynthesis. *Plant, Cell & Environment* **24**, 253-259.
- Coast O, Shah S, Ivakov A, Gaju O, Wilson PB, Posch BC, Bryant CJ, Negrini ACA, Evans JR, Condon AG, Silva-Pérez V, Reynolds MP, Pogson BJ, Millar AH, Furbank RT, Atkin OK.** 2019. Predicting dark respiration rates of wheat leaves from hyperspectral reflectance. *Plant, Cell & Environment* **42**, 2133-2150.
- Dechant B, Cuntz M, Vohland M, Schulz E, Doktor D.** 2017. Estimation of photosynthesis traits from leaf reflectance spectra: Correlation to nitrogen content as the dominant mechanism. *Remote Sensing of Environment* **196**, 279-292.
- Driever SM, Lawson T, Andralojc PJ, Raines CA, Parry MAJ.** 2014. Natural variation in photosynthetic capacity, growth, and yield in 64 field-grown wheat genotypes. *JOURNAL OF EXPERIMENTAL BOTANY*.
- Ecarnot M, Compan F, Roumet P.** 2013. Assessing leaf nitrogen content and leaf mass per unit area of wheat in the field throughout plant cycle with a portable spectrometer. *Field Crops Research* **140**, 44-50.
- Evans JR, von Caemmerer S.** 2013. Temperature response of carbon isotope discrimination and mesophyll conductance in tobacco. *Plant Cell & Environment* **36**, 745-756.
- Farquhar GD, von Caemmerer S, Berry JA.** 1980. A biochemical model of photosynthetic CO<sub>2</sub> assimilation in leaves of C<sub>3</sub> species. *PLANTA* **149**, 78-90.
- Fischer RA, Rees D, Sayre KD, Lu ZM, Condon AG, Saavedra AL.** 1998. Wheat yield progress associated with higher stomatal conductance and photosynthetic rate, and cooler canopies. *Crop Science* **38**, 1467-1475.
- Gaju O, DeSilva J, Carvalho P, Hawkesford MJ, Griffiths S, Greenland A, Foulkes MJ.** 2016. Leaf photosynthesis and associations with grain yield, biomass and nitrogen-use efficiency in landraces, synthetic-derived lines and cultivars in wheat. *Field Crops Research* **193**, 1-15.
- Heckmann D, Schluter U, Weber APM.** 2017. Machine learning techniques for predicting crop photosynthetic capacity from leaf reflectance spectra. *Molecular Plant* **10**, 878-890.
- June T, Evans JR, Farquhar GD.** 2004. A simple new equation for the reversible temperature dependence of photosynthetic electron transport: a study on soybean leaf. *FUNCTIONAL PLANT BIOLOGY* **31**, 275-283.
- Kuhlgert S, Austic G, Zegarac R, Osei-Bonsu I, Hoh D, Chilvers MI, Roth MG, Bi K, TerAvest D, Weebadde P, Kramer DM.** 2016. MultispeQ Beta: a tool for large-scale plant phenotyping connected to the open PhotosynQ network. *Royal Society Open Science* **3**.
- Meacham-Hensold K, Montes CM, Wu J, Guan KY, Fu P, Ainsworth EA, Pederson T, Moore CE, Brown KL, Raines C, Bernacchi CJ.** 2019. High-throughput field phenotyping using hyperspectral reflectance and partial least squares regression (PLSR) reveals genetic modifications to photosynthetic capacity. *Remote Sensing of Environment* **231**.
- Medlyn BE, Dreyer E, Ellsworth D, Forstreuter M, Harley PC, Kirschbaum MUF, Le Roux X, Montpied P, Strassemeier J, Walcroft A, Wang K, Loustau D.** 2002. Temperature response of



parameters of a biochemically based model of photosynthesis. II. A review of experimental data. *Plant, Cell & Environment* **25**, 1167-1179.

**Parry MAJ, Reynolds M, Salvucci ME, Raines C, Andralojc PJ, Zhu X-G, Price GD, Condon AG, Furbank RT.** 2011. Raising yield potential of wheat. II. Increasing photosynthetic capacity and efficiency. *JOURNAL OF EXPERIMENTAL BOTANY* **62**, 453-467.

**R.** 2013. R: A language and environment for statistical computing. . R Foundation for Statistical Computing, Vienna, Austria.

**Reynolds M, Foulkes MJ, Slafer GA, Berry P, Parry MAJ, Snape JW, Angus WJ.** 2009. Raising yield potential in wheat. *JOURNAL OF EXPERIMENTAL BOTANY* **60**, 1899-1918.

**Sadras VO, Lawson C, Montoro A.** 2012. Photosynthetic traits in Australian wheat varieties released between 1958 and 2007. *Field Crops Research* **134**, 19-29.

**Serbin SP, Dillaway DN, Kruger EL, Townsend PA.** 2012. Leaf optical properties reflect variation in photosynthetic metabolism and its sensitivity to temperature. *JOURNAL OF EXPERIMENTAL BOTANY* **63**, 489-502.

**Sharwood RE, Ghannoum O, Kapralov MV, Gunn LH, Whitney SM.** 2016. Temperature responses of Rubisco from Paniceae grasses provide opportunities for improving C3 photosynthesis. *Nature Plants* **2**, 16186.

**Shearman VJ, Sylvester-Bradley R, Scott RK, Foulkes MJ.** 2005. Physiological processes associated with wheat yield progress in the UK. *Crop Science* **45**, 175-185.

**Silva-Pérez V, De Faveri J, Molero G, Deery DM, Condon AG, Reynolds MP, Evans JR, Furbank RT.** 2019. Genetic variation for photosynthetic capacity and efficiency in spring wheat. *JOURNAL OF EXPERIMENTAL BOTANY* **71**, 2299-2311.

**Silva-Perez V, Furbank RT, Condon AG, Evans JR.** 2017. Biochemical model of C-3 photosynthesis applied to wheat at different temperatures. *PLANT CELL AND ENVIRONMENT* **40**, 1552-1564.

**Silva-Perez V, Molero G, Serbin SP, Condon AG, Reynolds MP, Furbank RT, Evans JR.** 2018. Hyperspectral reflectance as a tool to measure biochemical and physiological traits in wheat. *JOURNAL OF EXPERIMENTAL BOTANY* **69**, 483-496.

**Wright IJ, Reich PB, Westoby M, Ackerly DD, Baruch Z, Bongers F, Cavender-Bares J, Chapin T, Cornelissen JHC, Diemer M, Flexas J, Garnier E, Groom PK, Gulias J, Hikosaka K, Lamont BB, Lee T, Lee W, Lusk C, Midgley JJ, Navas M-L, Niinemets U, Oleksyn J, Osada N, Poorter H, Poot P, Prior L, Pyankov VI, Roumet C, Thomas SC, Tjoelker MG, Veneklaas EJ, Villar R.** 2004. The worldwide leaf economics spectrum. *Nature* **428**, 821-827.

**Wu J, Rogers A, Albert LP, Ely K, Prohaska N, Wolfe BT, Oliveira RC, Saleska SR, Serbin SP.** 2019. Leaf reflectance spectroscopy captures variation in carboxylation capacity across species, canopy environment and leaf age in lowland moist tropical forests. *NEW PHYTOLOGIST* **224**, 663-674.

**Yao YR, Lv LH, Zhang LH, Yao HP, Dong ZQ, Zhang JT, Ji JJ, Jia XL, Wang HJ.** 2019. Genetic gains in grain yield and physiological traits of winter wheat in Hebei Province of China, from 1964 to 2007. *Field Crops Research* **239**, 114-123.

**Yendrek CR, Tomaz T, Montes CM, Cao Y, Morse AM, Brown PJ, McIntyre LM, Leakey ADB, Ainsworth EA.** 2017. High-throughput phenotyping of maize leaf physiological and biochemical traits using hyperspectral reflectance. *PLANT PHYSIOLOGY* **173**, 614-626.
